# Supplementary material
Source: publisher site journal article supplement (doi:10.18632/aging.203983)
Supplement: Supplementary file 2 [file aging-v14-203983-supplementary-material-SD1.pdf]

## SUPPLEMENTARY TABLE

Supplementary Table 1. Patient information.

| Variables           | Number |
|---------------------|--------|
| Age                 |        |
| <50 years           | 22     |
| ≥50 years           | 8      |
| Tumor stage         |        |
| pT1/pT2             | 16     |
| pT3/pT4             | 14     |
| Fuhrman grade       |        |
| Grade ½             | 17     |
| Grade ¾             | 13     |
| Tumor diameter (cm) |        |
| ≤7 cm               | 18     |
| >7 cm               | 12     |
